# Supplementary material for: Continually band-tunable bismuth oxyhalides BiOBr1−xIx as O2-evolving photocatalysts for visible-light-driven Z-scheme water splitting
Source: Royal Society of Chemistry journal article supplement (doi:10.1039/d6sc02302a), 2026-06-17
Supplement: d6sc02302a1.pdf [file d6sc02302a1.pdf]

## *Supporting Information*

### Continually band-tunable bismuth oxyhalides BiOBr<sub>1-x</sub>I<sub>x</sub> as O<sub>2</sub>-evolving photocatalysts for visible-light-driven Z-scheme water splitting

*Hajime Suzuki,<sup>a,b,\*</sup> Akitoshi Nakamura,<sup>a</sup> Miyuki Ikeda,<sup>a</sup> Toshiki Abe,<sup>a</sup> Yuuki Iida,<sup>a</sup> Osamu Tomita,<sup>a</sup> Masanobu Higashi,<sup>a</sup> Shunsuke Nozawa,<sup>c</sup> Akinori Saeki,<sup>d</sup> and Ryu Abe<sup>a,\*</sup>*

<sup>a</sup> Department of Energy and Hydrocarbon Chemistry, Graduate School of Engineering, Kyoto University, Katsura, Nishikyo-ku, Kyoto 615-8510, Japan

<sup>b</sup> Precursory Research for Embryonic Science and Technology (PRESTO), Japan Science and Technology Agency (JST), 4-1-8 Honcho, Kawaguchi, Saitama 332-0012, Japan

<sup>c</sup> Photon Factory (PF), Institute of Materials Structure Science (IMSS), High Energy Accelerator Research Organization (KEK), Tsukuba, Ibaraki 305-0801, Japan

<sup>d</sup> Department of Applied Chemistry, Graduate School of Engineering, The University of Osaka, 2-1 Yamadaoka, Suita, Osaka 565-0871, Japan

#### AUTHOR INFORMATION

##### **Corresponding Author**

\* [suzuki.hajime.7x@kyoto-u.ac.jp](mailto:suzuki.hajime.7x@kyoto-u.ac.jp) (H. S.)

\* [ryu-abe@scl.kyoto-u.ac.jp](mailto:ryu-abe@scl.kyoto-u.ac.jp) (R. A.)

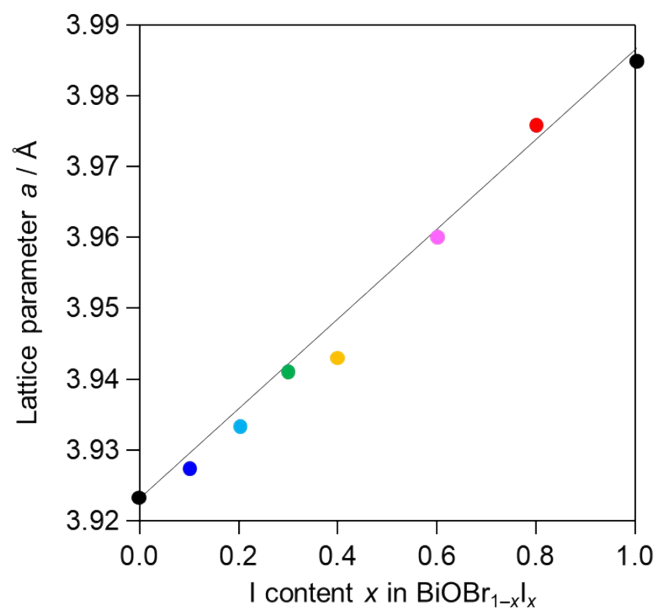

**Figure S1.** Lattice parameter  $a$  of the  $\text{BiOBr}_{1-x}\text{I}_x$  samples ( $x = 0-1$ ) determined from the XRD patterns.

**Table S1.** EDX-determined I/(Br + I) and I/Bi ratios of  $\text{BiOBr}_{1-x}\text{I}_x$  solid solutions.

| $x$ | I/(Br+I) | I/Bi |
|-----|----------|------|
| 0.1 | 0.11     | 0.11 |
| 0.2 | 0.19     | 0.19 |
| 0.3 | 0.26     | 0.26 |
| 0.4 | 0.38     | 0.40 |
| 0.6 | 0.57     | 0.62 |
| 0.8 | 0.78     | 0.77 |

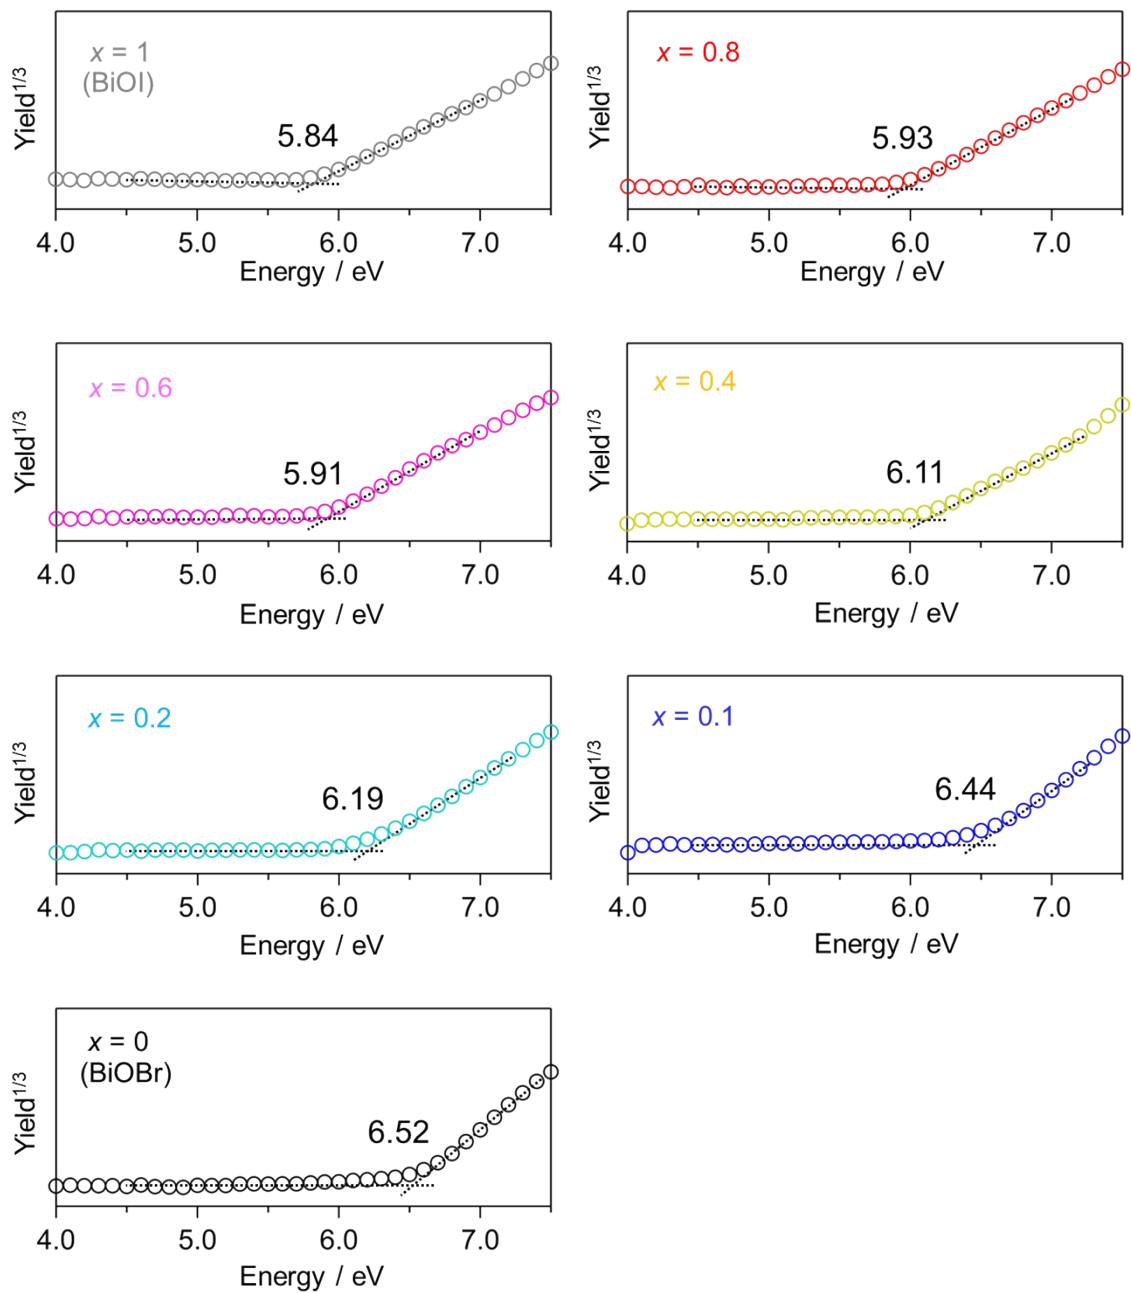

**Figure S2.** Photoelectron yield spectroscopy (PYS) spectra of BiOBr<sub>1-x</sub>I<sub>x</sub> samples (x = 0–1).

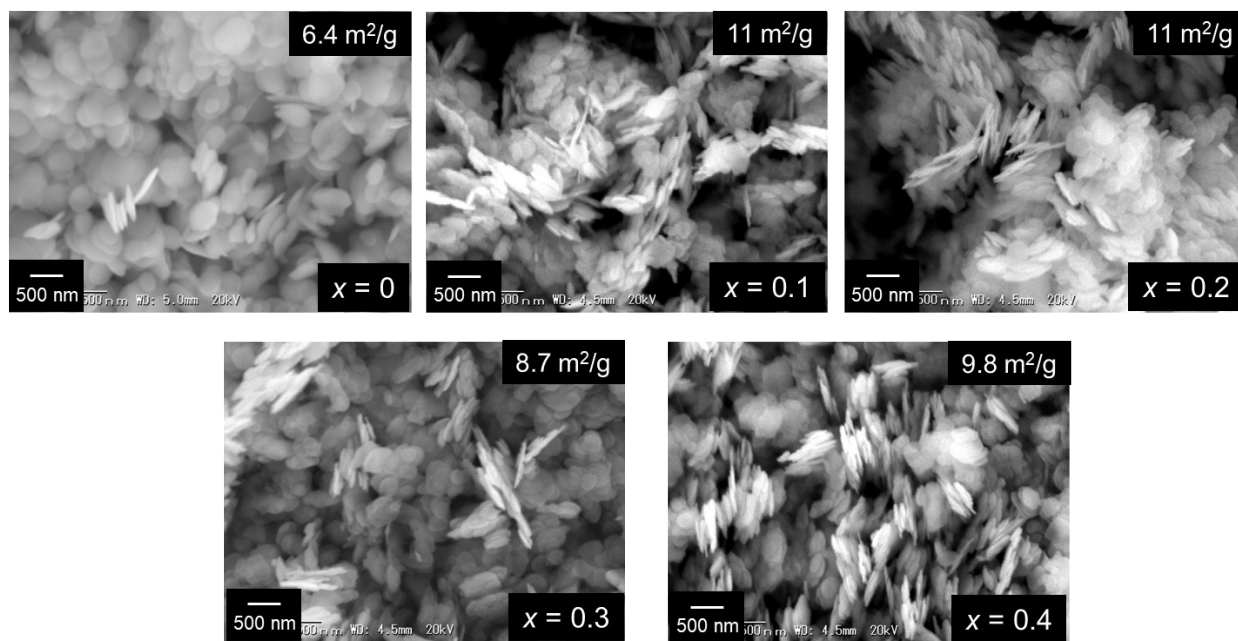

**Figure S3.** SEM images of representative  $\text{BiOBr}_{1-x}\text{I}_x$  samples ( $x = 0-0.4$ ).

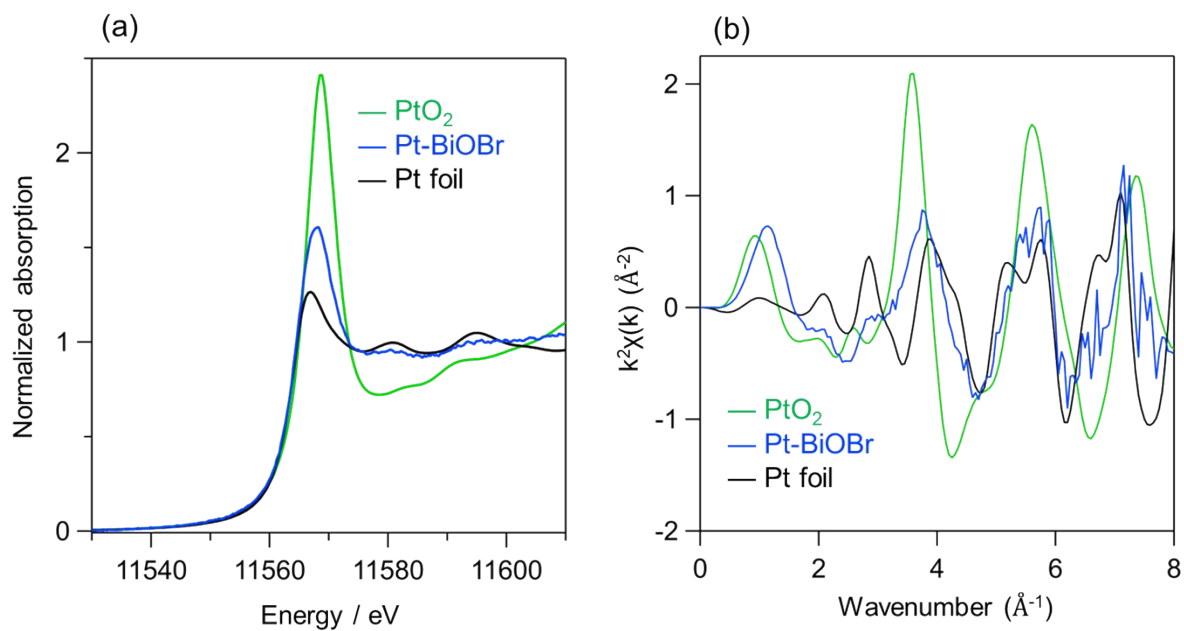

**Figure S4.** (a) Pt L<sub>3</sub>-edge XANES spectrum and (b) EXAFS  $k^2\chi(k)$  function for Pt-BiOBr, along with those of Pt foil and PtO<sub>2</sub> as references.

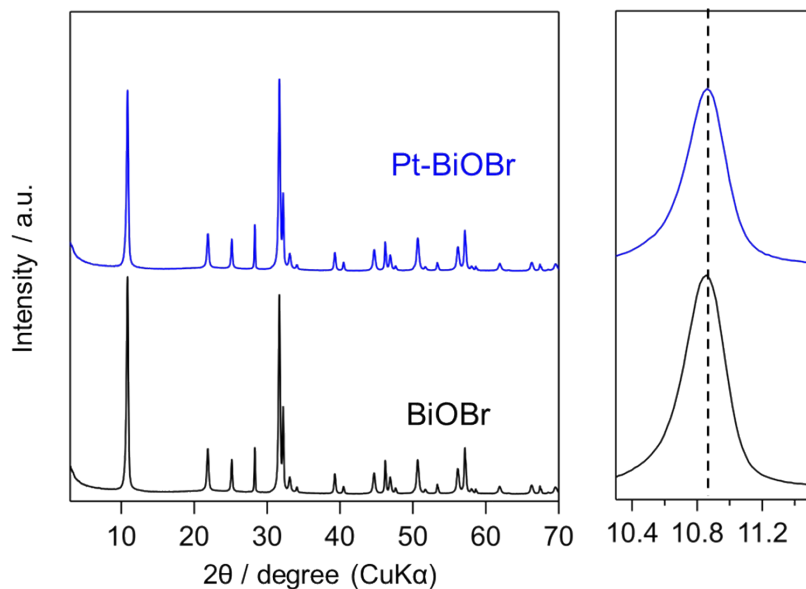

**Figure S5.** XRD patterns of BiOBr and Pt-BiOBr.

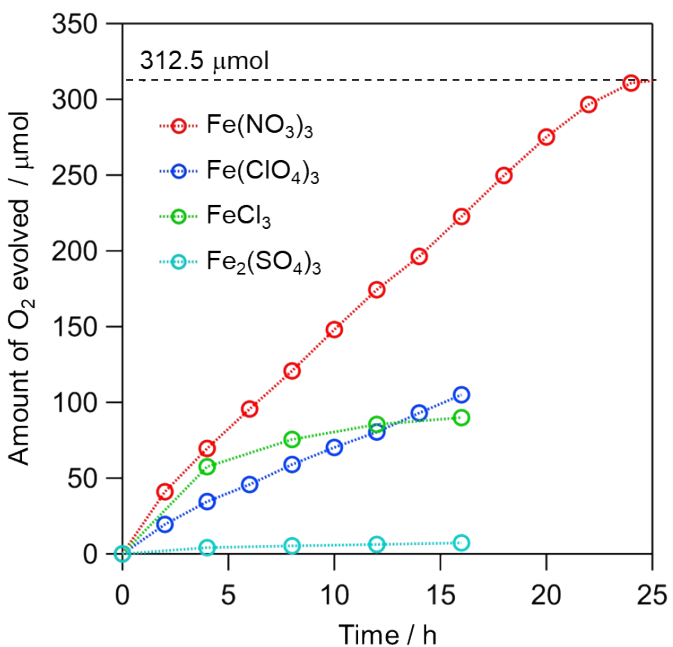

**Figure S6.** Time courses of O<sub>2</sub> evolution over unmodified BiOBr from aqueous Fe<sup>3+</sup> solution (5 mM, 250 mL) with various counter anions (NO<sub>3</sub><sup>-</sup>, ClO<sub>4</sub><sup>-</sup>, Cl<sup>-</sup>, or SO<sub>4</sub><sup>2-</sup>) under UV–visible light irradiation ( $\lambda > 300$  nm).

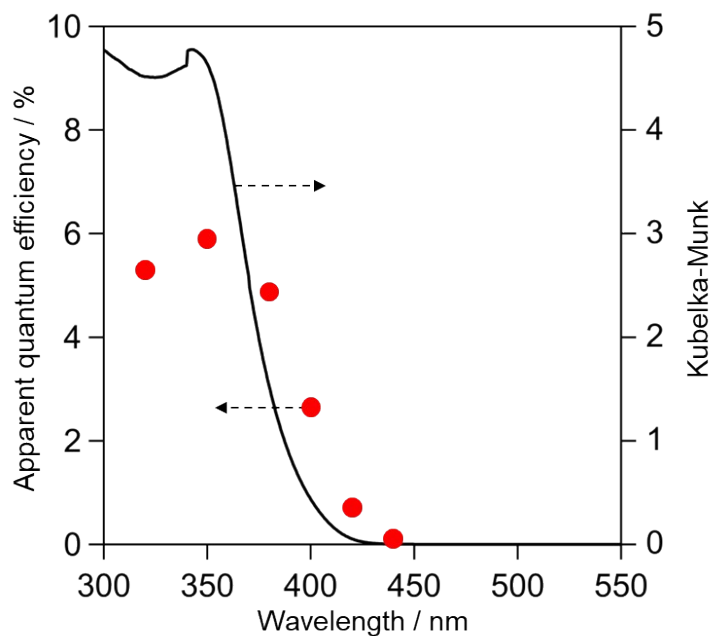

**Figure S7.** Apparent quantum efficiency of Pt-BiOBr for O<sub>2</sub> evolution from aqueous Fe(NO<sub>3</sub>)<sub>3</sub> solutions under monochromatic light irradiation.

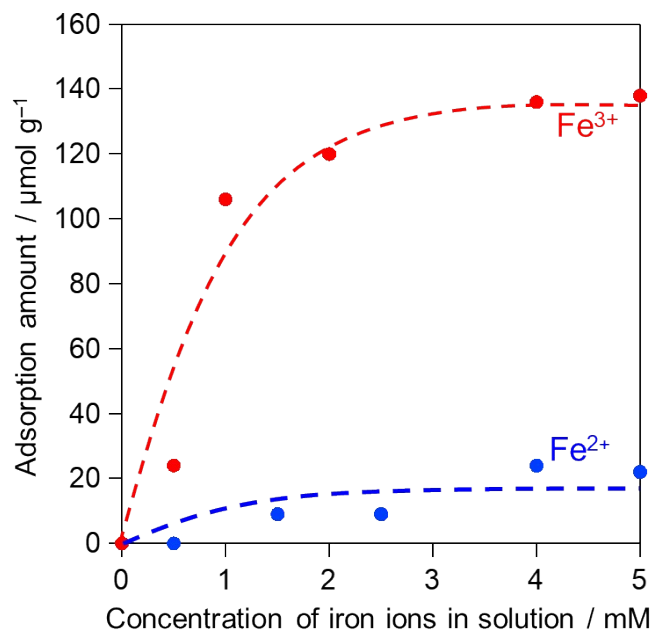

**Figure S8.** Adsorption properties of iron cations (Fe<sup>2+</sup> and Fe<sup>3+</sup>) on BiOBr (counter anion: ClO<sub>4</sub><sup>-</sup>).

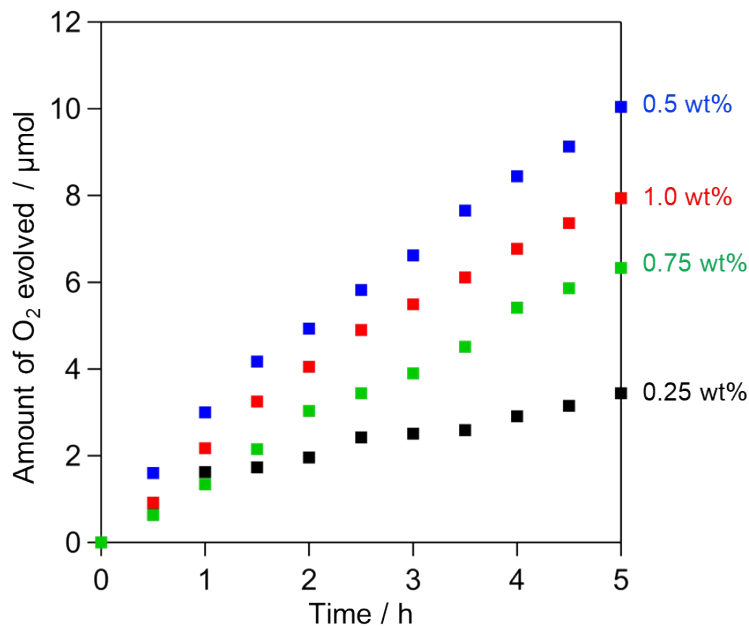

**Figure S9.** Time courses of O<sub>2</sub> evolution over Pt-BiOBr<sub>1-x</sub>I<sub>x</sub> with different Pt loadings (0.25, 0.5, 0.75, and 1.0 wt%) from an aqueous Fe(NO<sub>3</sub>)<sub>3</sub> solution (1 mM, 250 mL) under visible light ( $\lambda > 400$  nm).

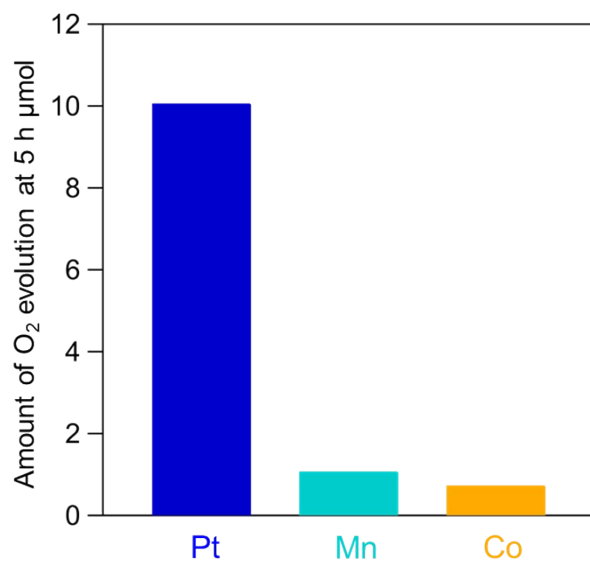

**Figure S10.** Photocatalytic O<sub>2</sub> evolution amounts over BiOBr<sub>0.9</sub>I<sub>0.1</sub> loaded with different cocatalysts (Pt, Mn, and Co species) from an aqueous Fe(NO<sub>3</sub>)<sub>3</sub> solution (1 mM, 250 mL) under visible light ( $\lambda > 400$  nm). Mn and Co species were loaded by the impregnation method (0.5 wt% as metal) using Co(NO<sub>3</sub>)<sub>2</sub>·6H<sub>2</sub>O and Mn(NO<sub>3</sub>)<sub>2</sub>·6H<sub>2</sub>O as precursors, respectively, followed by calcination in air at 350 °C for 1 h.

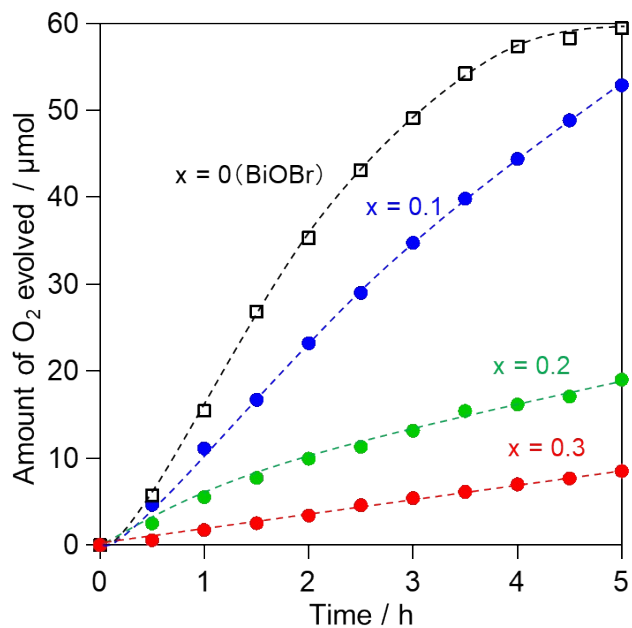

**Figure S11.** Time courses of O<sub>2</sub> evolution over Pt-BiOBr<sub>1-x</sub>I<sub>x</sub> from aqueous Fe(NO<sub>3</sub>)<sub>3</sub> solution (1 mM, 250 mL) under UV-visible light ( $\lambda > 300$  nm).

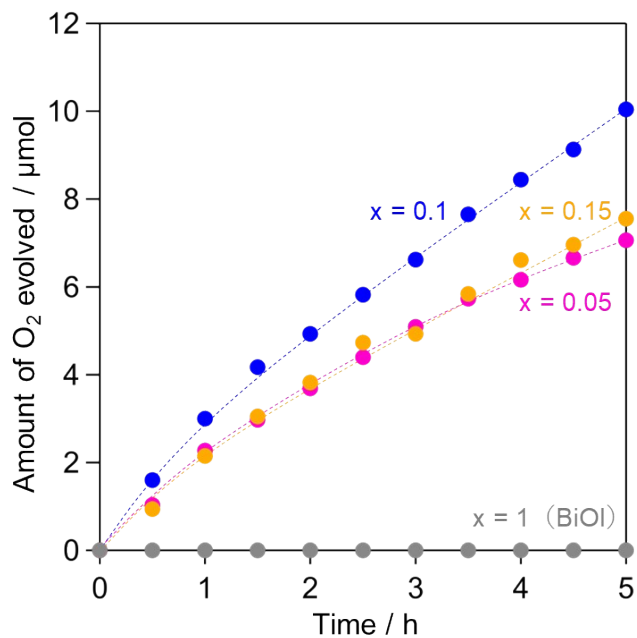

**Figure S12.** Time course of O<sub>2</sub> evolution over Pt-BiOBr<sub>1-x</sub>I<sub>x</sub> ( $x = 0.05, 0.1, 0.15,$  and  $1$ ) from an aqueous Fe(NO<sub>3</sub>)<sub>3</sub> solution (1 mM, 250 mL) under visible light ( $\lambda > 400$  nm).

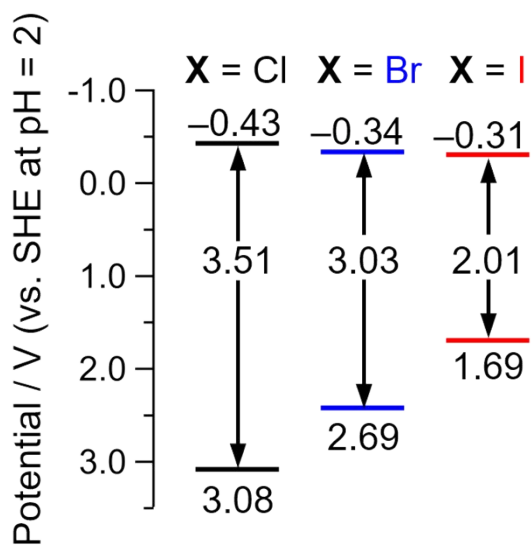

**Figure S13.** Band levels of BiOX estimated from the diffuse reflectance spectra and Mott–Schottky plots. This figure is reproduced from *Phys. Chem. Chem. Phys.*, 2026, **28**, 38–41.

**Table S2.** Full width at half-maximum (FWHM) and crystallite sizes for the (001) and (102) peaks in the XRD patterns of BiOBr<sub>1-x</sub>I<sub>x</sub> ( $x = 0–0.3$ ).

| $x$ | FWHM (001) (deg.) | Crystallite size <sup>a</sup> (001) (Å) | FWHM (102) (deg.) | Crystallite size <sup>a</sup> (102) (Å) |
|-----|-------------------|-----------------------------------------|-------------------|-----------------------------------------|
| 0   | 0.332             | 251                                     | 0.268             | 322                                     |
| 0.1 | 0.449             | 186                                     | 0.370             | 233                                     |
| 0.2 | 0.471             | 177                                     | 0.523             | 165                                     |
| 0.3 | 0.561             | 149                                     | 0.697             | 124                                     |

<sup>a</sup>Crystallite sizes were estimated using the Scherrer equation.

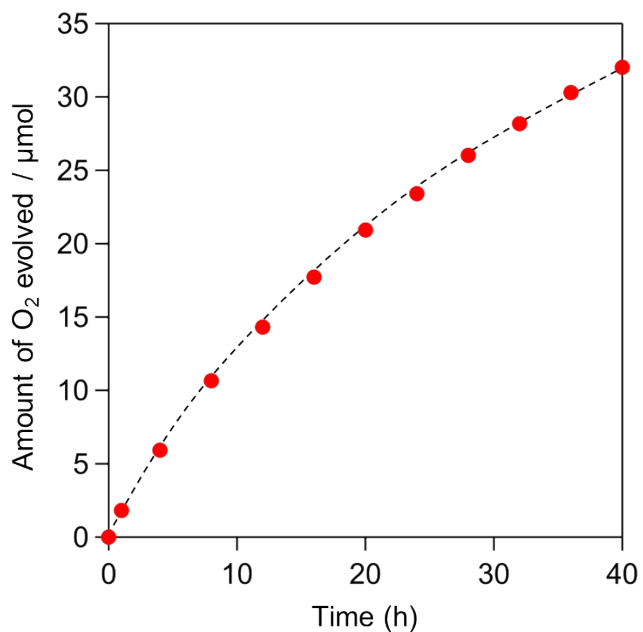

**Figure S14.** Time courses of O<sub>2</sub> evolution over Pt-BiOBr<sub>0.9</sub>I<sub>0.1</sub> from aqueous Fe(NO<sub>3</sub>)<sub>3</sub> solution (1 mM, 250 mL) under visible light ( $\lambda > 400$  nm) during a prolonged reaction period.

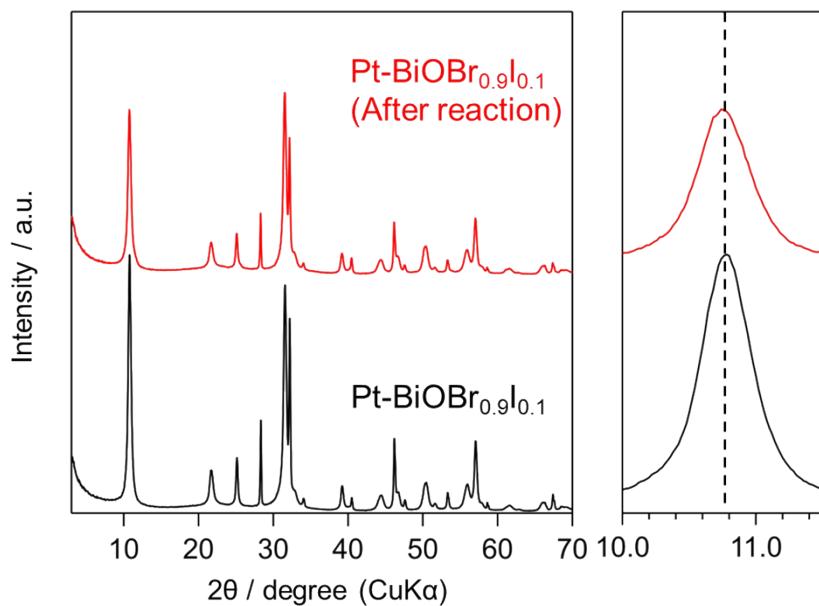

**Figure S15.** XRD pattern of Pt-BiOBr<sub>0.9</sub>I<sub>0.1</sub> before and after long-term photocatalytic O<sub>2</sub> evolution (Figure S14) under visible-light irradiation ( $\lambda > 400$  nm).

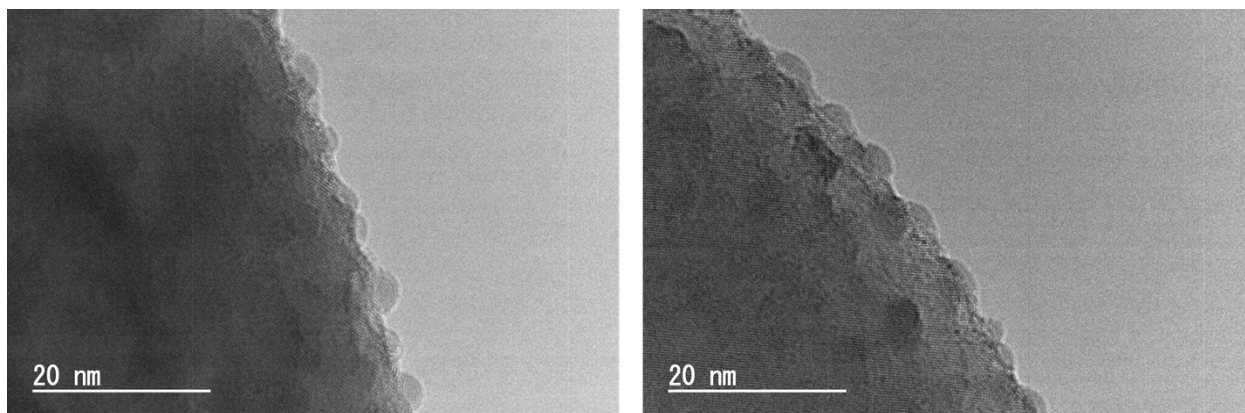

**Figure S16.** TEM image of Pt-BiOBr<sub>0.9</sub>I<sub>0.1</sub> via the arc plasma method.

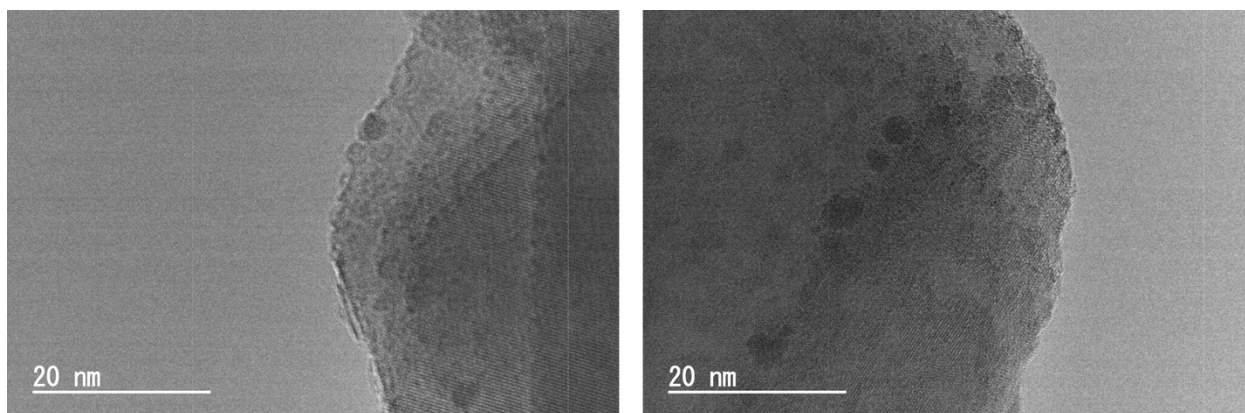

**Figure S17.** TEM image of Pt-BiOBr<sub>0.9</sub>I<sub>0.1</sub> via the impregnation method.

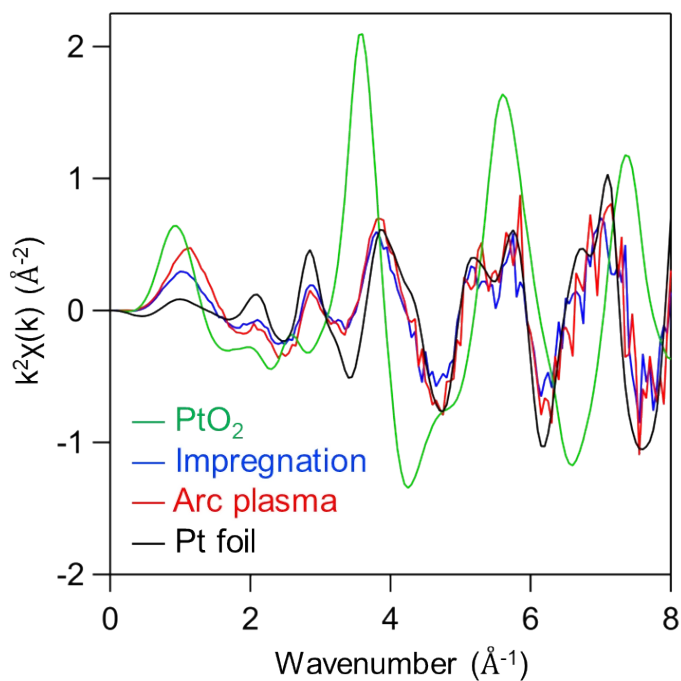

**Figure S18.** Pt L<sub>3</sub>-edge EXAFS  $k^2\chi(k)$  function for Pt-BiOBr<sub>0.9</sub>I<sub>0.1</sub> prepared by arc-plasma and impregnation methods, along with those of Pt foil and PtO<sub>2</sub> as references.

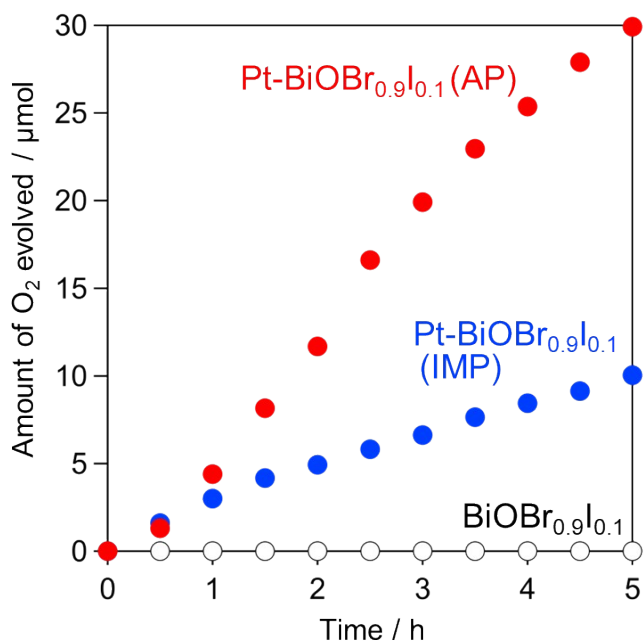

**Figure S19.** Time courses of O<sub>2</sub> evolution over BiOBr<sub>0.9</sub>I<sub>0.1</sub> or Pt-BiOBr<sub>0.9</sub>I<sub>0.1</sub> prepared by arc plasma (AP) or impregnation (IMP) methods from aqueous Fe(NO<sub>3</sub>)<sub>3</sub> solution (1 mM) under visible-light irradiation ( $\lambda > 400$  nm).

**Table S3.** EDX-determined I/(Br + I) and I/Bi ratios of Pt-BiOBr<sub>0.9</sub>I<sub>0.1</sub> (AP) before and after the O<sub>2</sub> evolution.

|                                                                                  | I/(Br+I) | I/Bi |
|----------------------------------------------------------------------------------|----------|------|
| BiOBr <sub>0.9</sub> I <sub>0.1</sub>                                            | 0.11     | 0.11 |
| Pt-BiOBr <sub>0.9</sub> I <sub>0.1</sub> (AP) after the O <sub>2</sub> evolution | 0.12     | 0.12 |

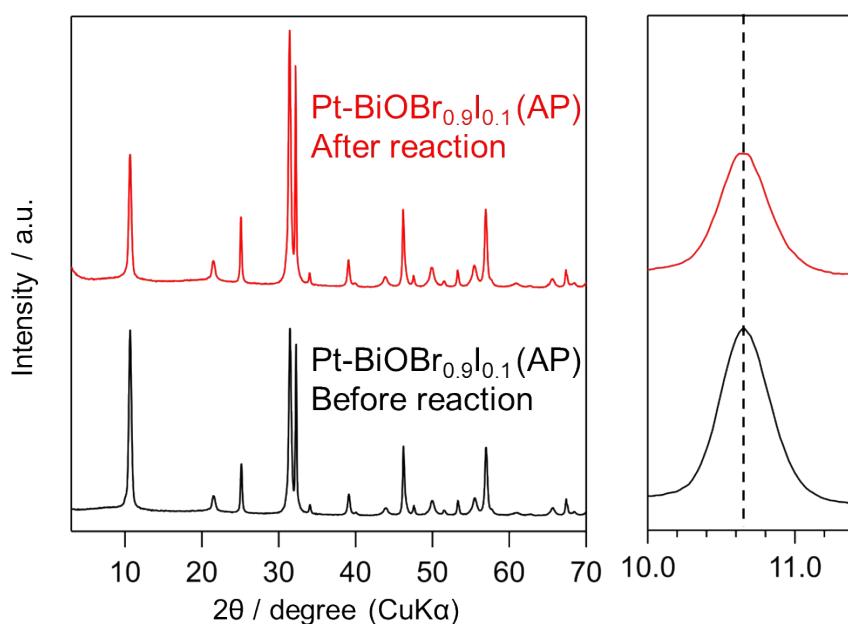

**Figure S20.** XRD pattern of Pt-BiOBr<sub>0.9</sub>I<sub>0.1</sub> prepared by arc-plasma (AP) after photocatalytic O<sub>2</sub> evolution under visible light irradiation ( $\lambda > 400$  nm). The data were collected using a MiniFlex 600-C diffractometer (Rigaku Corp.) with Cu K $\alpha$  radiation.

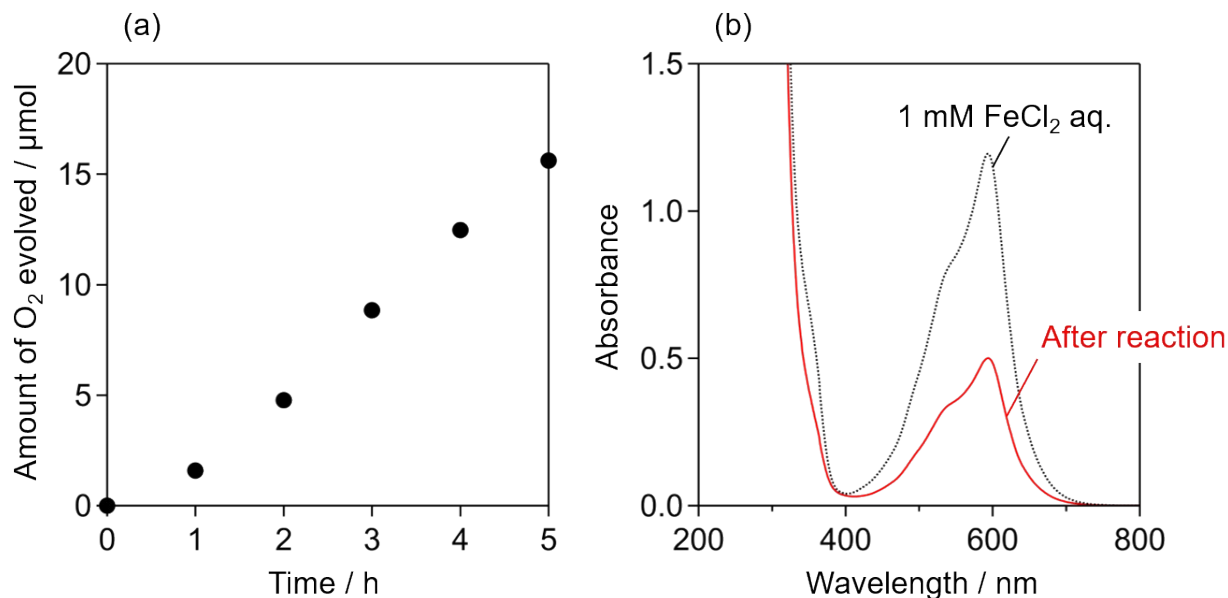

**Figure S21.** (a) Time courses of O<sub>2</sub> evolution over Pt-BiOBr<sub>0.9</sub>I<sub>0.1</sub> (AP) from aqueous Fe(NO<sub>3</sub>)<sub>3</sub> solution (1 mM) under visible-light irradiation ( $\lambda > 400$  nm). (b) Absorption spectra of aqueous solutions in the presence of Fe<sup>2+</sup> after the photocatalytic reaction; Fe<sup>2+</sup> is detected as Fe<sup>2+</sup>-2,4,6-tris(2-pyridyl)-1,3,5-triazine (TPTZ) complex (see *J. Am. Chem. Soc.* 2021, **143**, 8446–8453). The amount of evolved O<sub>2</sub> and generated Fe<sup>2+</sup> after 5 h of irradiation was estimated to be 16 and 60 μmol, respectively, which are in reasonable agreement considering the four-electron nature of water oxidation.

**Table S4.** Comparison of apparent quantum efficiency (AQE) of photocatalytic O<sub>2</sub> evolution in the presence of Fe<sup>3+</sup> electron acceptors on various Sillén-type oxyhalide photocatalysts.

| Photocatalyst                                    | Wavelength | Electron acceptor                                                    | Cocatalyst       | AQE (%) | Ref.      |
|--------------------------------------------------|------------|----------------------------------------------------------------------|------------------|---------|-----------|
| PbBiO <sub>2</sub> Cl                            | 400 nm     | Fe(NO) <sub>3</sub>                                                  | RuO <sub>2</sub> | 0.9     | (1)       |
| PbBi <sub>3</sub> O <sub>4</sub> Cl <sub>3</sub> | 400 nm     | Fe(ClO <sub>4</sub> ) <sub>3</sub>                                   | RuO <sub>x</sub> | 1.9     | (2)       |
| SrBi <sub>3</sub> O <sub>4</sub> Cl <sub>3</sub> | 420 nm     | Fe <sub>2</sub> (SO <sub>4</sub> ) <sub>3</sub><br>FeCl <sub>3</sub> | RuO <sub>2</sub> | 0.3     | (3)       |
|                                                  |            |                                                                      |                  | 0.9     |           |
| BiOBr <sub>0.9</sub> I <sub>0.1</sub>            | 405 nm     | Fe(NO) <sub>3</sub>                                                  | Pt               | 0.7     | This work |

Reference

- (1) *Chem. Mater.* 2018, **30**, 5862–5869.  
 (2) *Chem. Mater.* 2021, **33**, 9580-9587.  
 (3) *J. Mater. Chem. A*, 2023, **11**, 15159-15167.

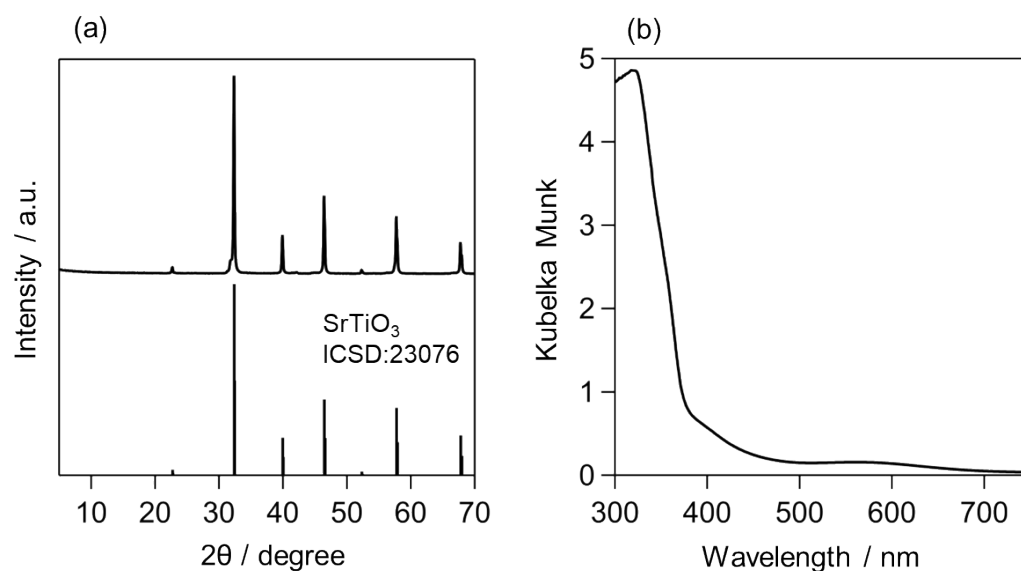

**Figure S22.** (a) XRD pattern and (b) UV–vis diffuse reflectance spectrum of SrTiO<sub>3</sub>:Rh.

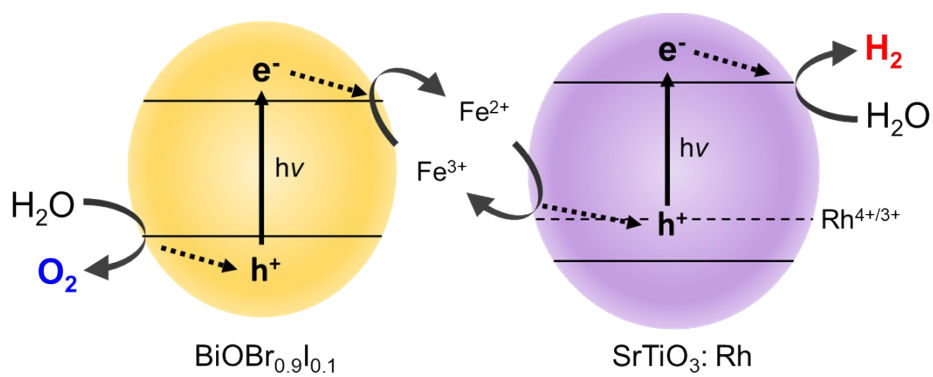

**Figure S23.** Schematic of Z-scheme water splitting using a mixture of Ru-loaded  $\text{SrTiO}_3:\text{Rh}$  as a  $\text{H}_2$ -evolution photocatalyst and Pt- $\text{BiOBr}_{0.9}\text{I}_{0.1}$  (AP) as an  $\text{O}_2$ -evolution photocatalyst in the presence of an  $\text{Fe}^{3+}/\text{Fe}^{2+}$  redox mediator.
